# Supplementary material for: Optimization of Alkaline Extraction of Xylan-Based Hemicelluloses from Wheat Straws: Effects of Microwave, Ultrasound, and Freeze–Thaw Cycles
Source: MDPI journal article supplement (doi:10.3390/polym15041038), 2023-02-19
Supplement: s1 [file s1]

# Optimization of alkaline extraction of xylan-based hemicelluloses from wheat straws: effects of microwave, ultrasound and freeze-thaw cycles

Adrian Cătălin Puițel <sup>1</sup>, Gabriel Dan Suditu <sup>1</sup>, Elena Niculina Drăgoi <sup>1</sup>, Maricel Danu <sup>1,2</sup>, Gabriela-Liliana Ailiese <sup>2</sup>, Cătălin Dumitrel Balan <sup>1</sup>, Daniela-Lucia Chicet <sup>3</sup> and Mircea Teodor Nechita <sup>1,\*</sup>

<sup>1</sup> “Cristofor Simionescu” Faculty of Chemical Engineering and Environmental Protection, “Gheorghe Asachi” Technical University, Bd. Prof. Dimitrie Mangeron, No. 73, 700050 Iași, Romania

<sup>2</sup> “Petru Poni” Institute of Macromolecular Chemistry, 41A Grigore Ghica Voda Alley, 700487 Iași, Romania

<sup>3</sup> Faculty of Materials Science and Engineering, “Gheorghe Asachi” Technical University, Bd. Prof. Dimitrie Mangeron, No. 41, 700050 Iași, Romania

\* Correspondence: mircea-teodor.nechita@academic.tuiasi.ro

The complete FTIR spectra for the hemicelluloses materials obtained in the control case (HC\_C), optimized conditions considering objective O1 (HC\_O1) and the optimized conditions determined for objective O2 (HC\_O2) is presented in Figure S1.

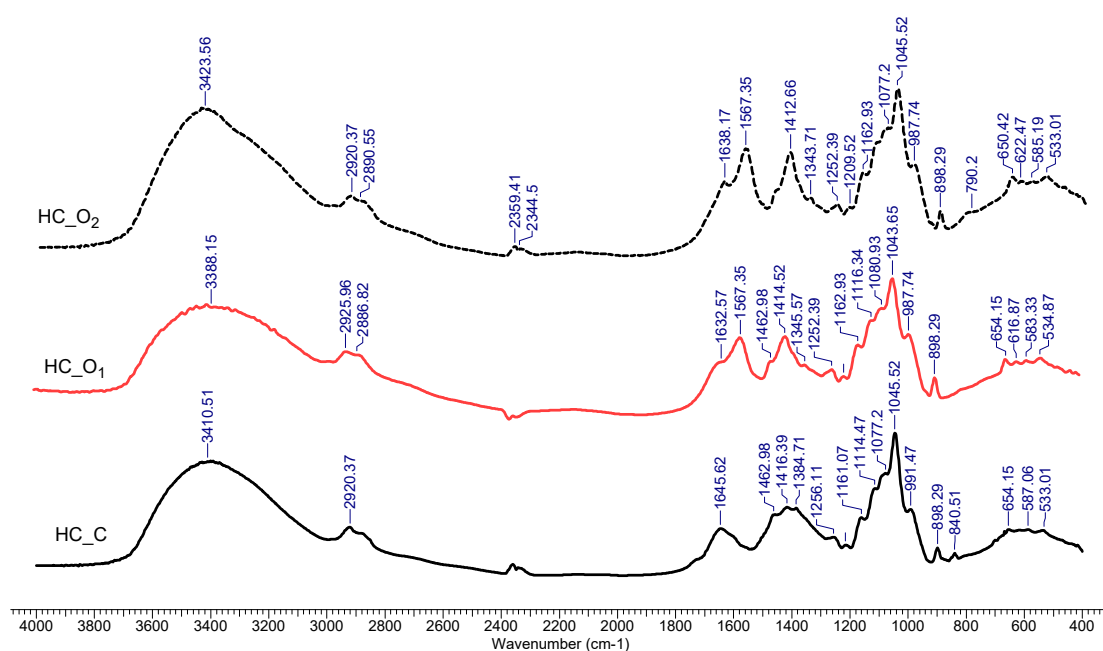

**Figure S1.** Complete FTIR spectra of separated hemicelluloses

Tables S1-S5 present the ANOVA analysis for the models determined for the 5 considered outputs of the process. In all cases, the models have a p-value<0.05, indicating that the determined models are statistically significant.

**Table S1.** ANOVA analysis results for the response model of the total extraction yield TY (%)

| Response TY (%)        |                |    |                                          |         |                     |
|------------------------|----------------|----|------------------------------------------|---------|---------------------|
| Source                 | Sum of Squares | df | Mean Square                              | F Value | p-value<br>Prob > F |
| Model                  | 404.73         | 5  | 80.95                                    | 50.278  | < 0.0001            |
| SF                     | 247.56         | 1  | 247.56                                   | 153.75  | < 0.0001            |
| CNaOH (%)              | 51.57          | 1  | 51.57                                    | 32.03   | 0.000767            |
| SF* CNaOH (%)          | 1.11           | 1  | 1.11                                     | 0.69    | 0.433               |
| SF <sup>2</sup>        | 99.68          | 1  | 99.68                                    | 61.91   | 0.000101            |
| CNaOH (%) <sup>2</sup> | 3.15           | 1  | 3.15                                     | 1.95    | 0.205               |
| Residual               | 11.27          | 7  | 1.61                                     |         |                     |
| Lack of Fit            | 10.74          | 3  | 3.58                                     | 26.86   | 0.00413             |
| Pure Error             | 0.53           | 4  | 0.13                                     |         |                     |
| Cor Total              | 415.99         | 12 |                                          |         |                     |
|                        |                |    | R-Squared: 0.973<br>Adj R-Squared: 0.954 |         |                     |

**Table S2** ANOVA analysis results for the response model of the xylan extraction yield XY (%)

| Response XY (%) |                |    |                                         |         |                     |
|-----------------|----------------|----|-----------------------------------------|---------|---------------------|
| Source          | Sum of Squares | df | Mean Square                             | F Value | p-value<br>Prob > F |
| Model           | 2064.16        | 3  | 688.05                                  | 52.81   | < 0.0001            |
| SF              | 729.94         | 1  | 729.94                                  | 56.03   | < 0.0001            |
| CNaOH (%)       | 1264.91        | 1  | 1264.91                                 | 97.09   | < 0.0001            |
| SF* CNaOH (%)   | 69.30          | 1  | 69.30                                   | 5.32    | 0.0465              |
| Residual        | 117.25         | 9  | 13.028                                  |         |                     |
| Lack of Fit     | 73.60          | 5  | 14.72                                   | 1.35    | 0.397               |
| Pure Error      | 43.65          | 4  | 10.91                                   |         |                     |
| Cor Total       | 2181.41        | 12 |                                         |         |                     |
|                 |                |    | R-Squared: 0.95<br>Adj R-Squared: 0.928 |         |                     |

**Table S3** ANOVA analysis results for the response model of the total hemicelluloses extraction yield HCY (%)

| Response HCY (%) |                |    |             |         |                     |
|------------------|----------------|----|-------------|---------|---------------------|
| Source           | Sum of Squares | df | Mean Square | F Value | p-value<br>Prob > F |
| Model            | 1763.01        | 3  | 587.67      | 47.54   | < 0.0001            |
| SF               | 649.81         | 1  | 649.81      | 52.57   | < 0.0001            |
| CNaOH (%)        | 1093.89        | 1  | 1093.891    | 88.50   | < 0.0001            |
| SF* CNaOH (%)    | 19.29          | 1  | 19.29       | 1.56    | 0.243               |
| Residual         | 111.24         | 9  | 12.36       |         |                     |

|             |         |    |                                        |       |       |
|-------------|---------|----|----------------------------------------|-------|-------|
| Lack of Fit | 62.13   | 5  | 12.43                                  | 1.012 | 0.510 |
| Pure Error  | 49.12   | 4  | 12.28                                  |       |       |
| Cor Total   | 1874.24 | 12 |                                        |       |       |
|             |         |    | R-Squared: 0.94<br>Adj R-Squared: 0.92 |       |       |

**Table S4** ANOVA analysis results for the response model of the acid insoluble lignin removal yield YAIL (%)

| Response YAIL (%)      |                |    |                                          |         |                     |
|------------------------|----------------|----|------------------------------------------|---------|---------------------|
| Source                 | Sum of Squares | df | Mean Square                              | F Value | p-value<br>Prob > F |
| Model                  | 4291.91        | 5  | 858.38                                   | 84.15   | < 0.0001            |
| SF                     | 2192.90        | 1  | 2192.90                                  | 214.97  | < 0.0001            |
| CNaOH (%)              | 265.19         | 1  | 265.19                                   | 25.99   | 0.00140             |
| SF* CNaOH (%)          | 33.29          | 1  | 33.29                                    | 3.26    | 0.114               |
| SF <sup>2</sup>        | 1589.96        | 1  | 1589.96                                  | 155.87  | < 0.0001            |
| CNaOH (%) <sup>2</sup> | 3.15           | 1  | 3.15                                     | 0.31    | 0.596               |
| Residual               | 71.41          | 7  | 10.20                                    |         |                     |
| Lack of Fit            | 47.71          | 3  | 15.90                                    | 2.69    | 0.182               |
| Pure Error             | 23.69          | 4  | 5.92                                     |         |                     |
| Cor Total              | 4363.31        | 12 |                                          |         |                     |
|                        |                |    | R-Squared: 0.984<br>Adj R-Squared: 0.972 |         |                     |

**Table S5** ANOVA analysis results for the response model of the acid soluble lignin removal yield YASL (%)

| Response YASL (%) |                |    |                                          |         |                     |
|-------------------|----------------|----|------------------------------------------|---------|---------------------|
| Source            | Sum of Squares | df | Mean Square                              | F Value | p-value<br>Prob > F |
| Model             | 550            | 3  | 183                                      | 24.1    | 0.000123            |
| SF                | 151            | 1  | 151                                      | 19.9    | 0.00157             |
| CNaOH (%)         | 334            | 1  | 334                                      | 44      | < 0.0001            |
| AB                | 64.2           | 1  | 64.2                                     | 8.44    | 0.0174              |
| Residual          | 68.5           | 9  | 7.61                                     |         |                     |
| Lack of Fit       | 58.7           | 5  | 11.7                                     | 4.81    | 0.0766              |
| Pure Error        | 9.76           | 4  | 2.44                                     |         |                     |
| Cor Total         | 618            | 12 |                                          |         |                     |
|                   |                |    | R-Squared: 0.889<br>Adj R-Squared: 0.852 |         |                     |
